# Supplementary material for: Butaselen prevents hepatocarcinogenesis and progression through inhibiting thioredoxin reductase activity
Source: PubMed Central journal article supplement — Redox Biol. 2017 Sep 22;14:237–49. doi: 10.1016/j.redox.2017.09.014 (PMC5633849; doi:10.1016/j.redox.2017.09.014), 2017-09-22
Supplement: mmc7.pdf [file mmc7.pdf]

Supplementary Table 3 The SiRNA sequence targeting TrxR1 and a scrambled SiRNA

|          |                                                                                    |
|----------|------------------------------------------------------------------------------------|
| si-TrxR1 | sense: 5'-GCAAGACUCUCGAAAUUAU-dTdT-3'<br>antisense: 5'-AUAAUUUCGAGAGUCUUGC-dTdT-3' |
| si-NC    | sense: 5'-UUCUCCGAACGUGUCACGUTT-3'<br>antisense: 5'-ACGUGACACGUUCGGAGAATT-3'       |
